# Supplementary material for: Synthesis, Characterization, and DNA Binding Studies of Nanoplumbagin
Source: Hindawi journal article supplement (doi:10.1155/2014/179149), 2014-01-01
Supplement: f1 [file 179149.f1.pdf]

## Supporting Information

### Synthesis, Characterization and DNA Binding Studies of Nanoplumbagin

*Sheik Dawood Shahida Parveen,<sup>a</sup> Abdullah Affrose,<sup>a</sup> Basuvaraj Suresh kumar,<sup>a</sup>*

*Jamespandi Annaraj,<sup>a</sup> Kasi Pitchumani\*<sup>a,b</sup>*

*<sup>a</sup>School of Chemistry, Madurai Kamaraj University, Madurai - 625021, India.*

*<sup>b</sup>Centre for Green Chemistry Processes, School of Chemistry, Madurai Kamaraj University,  
Madurai 625021, India*

*\*Email: pit12399@yahoo.com*

### Contents

1. Absorption spectra .....
2. FT-IR spectra.....
3. <sup>1</sup>H-NMR spectrum.....
4. DLS data.....
5. XRD pattern .....
6. Table of absorption spectra.....
7. Table of Redox behaviour .....

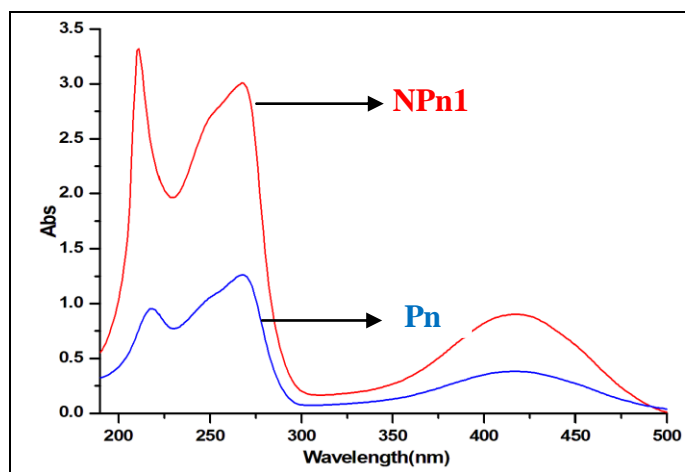

*Figure S1* UV-Vis., absorption spectra of **Pn** in aqueous media ( $1 \times 10^{-4}M$ ). The equivalent quantity of **NPn1** is fully dispersed in aqueous media ( $1 \times 10^{-4}M$ ).

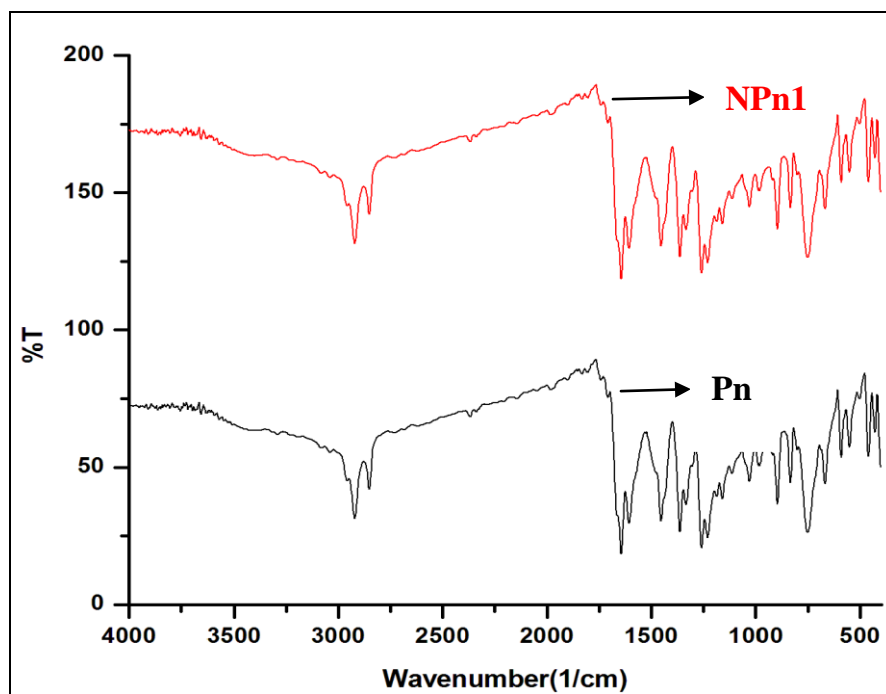

*Figure S2* FT-IR spectra of **NPn1** and commercial **Pn**

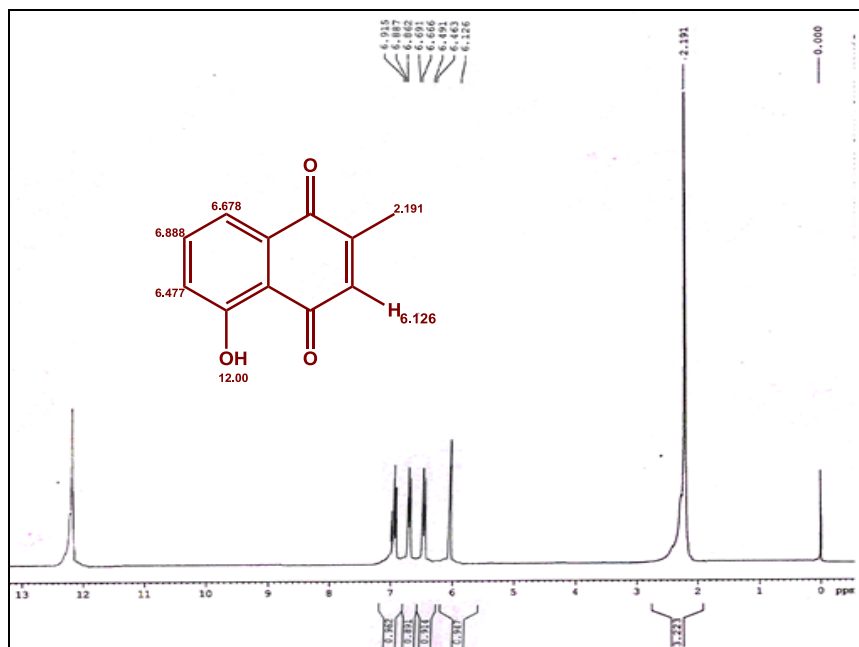

Figure S3  $^1\text{H-NMR}$  spectrum of NPn1

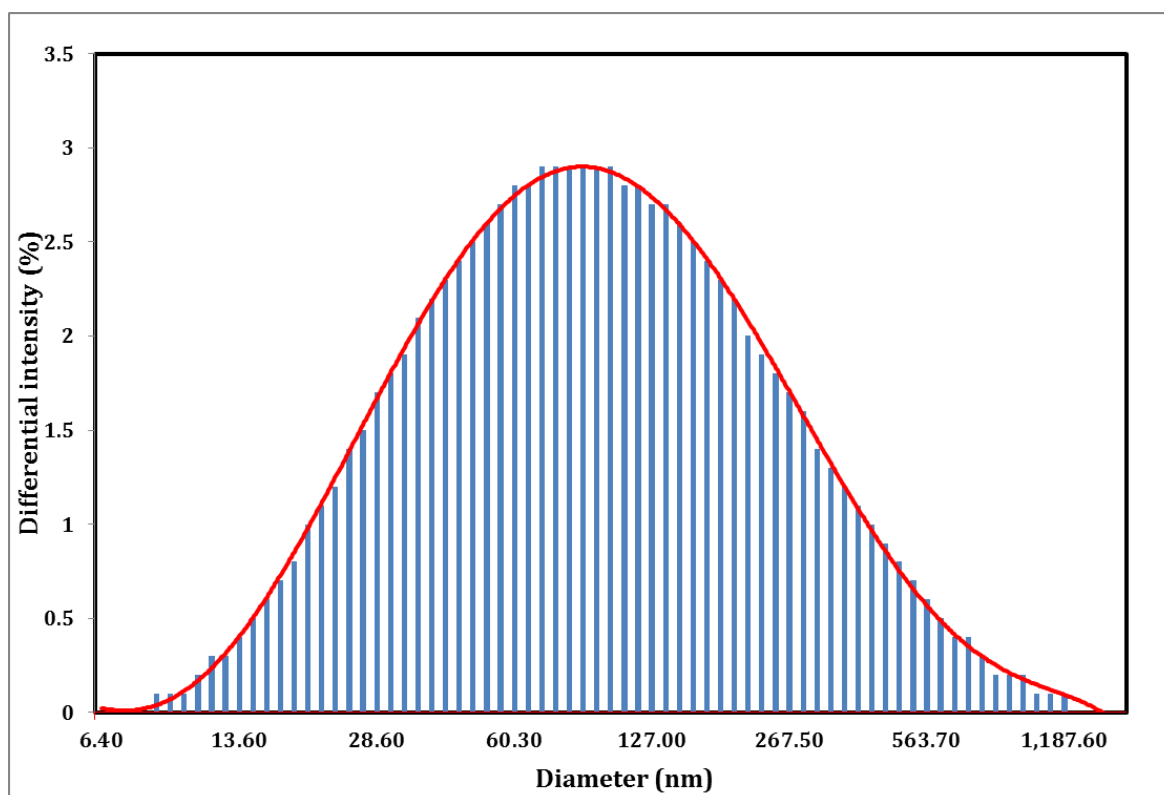

Figure S4 Dynamic light scattering data of NPn1

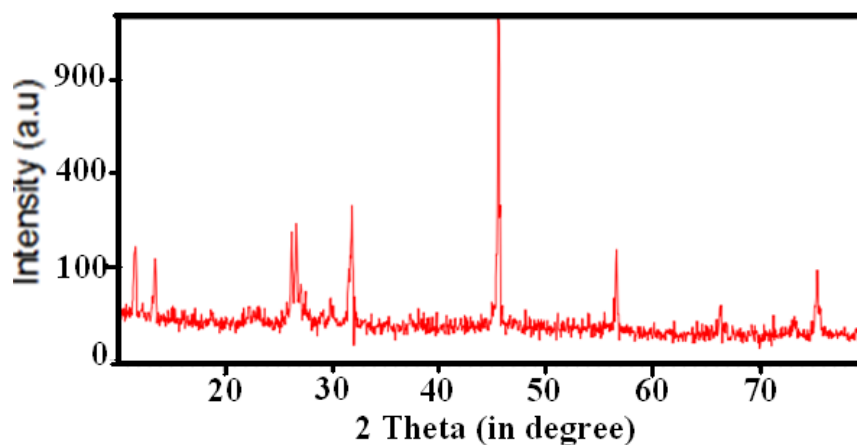

*Figure S5 XRD pattern of NPn1*

**Table 1 Absorption spectral properties of NPn1 & PLN bounda to HS-DNA in Tris-HCl buffer at pH 7.1**

| Compound | R   | Red shift $\Delta\lambda(\text{nm})$ | $K_b (\text{M}^{-1})$ |
|----------|-----|--------------------------------------|-----------------------|
| NPn1     | 0   | -                                    | $2.9 \times 10^4$     |
|          | 0.2 | 1                                    |                       |
|          | 0.4 | 2                                    |                       |
|          | 0.6 | 3                                    |                       |
|          | 0.8 | 4                                    |                       |
|          | 1   | 5                                    |                       |
| PLN      | 0   | -                                    | $5.3 \times 10^3$     |
|          | 0.2 | -                                    |                       |
|          | 0.4 | -                                    |                       |
|          | 0.6 | -                                    |                       |
|          | 0.8 | 1                                    |                       |
|          | 1   | 2                                    |                       |

**Table 2 Redox behaviour of NPn1 and PLN in the presence and absence of DNA<sup>a</sup>**

| Compound    | R   | $E_{pc}(mV)$ | $E_{pa}(mV)$ | $\Delta E_p(mV)$ | $E_{1/2}(mV)$ | $i_{pa}/i_{pc}$ | $K_+/K_{2+}$ |
|-------------|-----|--------------|--------------|------------------|---------------|-----------------|--------------|
| <b>NPn1</b> | 0   | -336         | -286         | 50               | -311          | 0.92            | 1.34         |
|             | 0.2 | -333         | -285         | 48               | -309          | 0.89            |              |
|             | 0.4 | -331         | -283         | 48               | -307          | 0.87            |              |
|             | 0.6 | -324         | -282         | 42               | -303          | 0.88            |              |
|             | 0.8 | -322         | -282         | 40               | -302          | 0.86            |              |
|             | 1   | -318         | -282         | 36               | -300          | 0.82            |              |
|             | 0   | -313         | -265         | 48               | -289          | 0.87            |              |
| <b>PLN</b>  | 0.2 | -309         | -262         | 42               | -286          | 0.83            | 1.18         |
|             | 0.4 | -307         | -262         | 45               | -283          | 0.81            |              |
|             | 0.6 | -305         | -261         | 44               | -282          | 0.81            |              |
|             | 0.8 | -304         | -260         | 44               | -282          | 0.79            |              |
|             | 1   | -302         | -261         | 41               | -281          | 0.77            |              |

<sup>a</sup>Compounds were taken in Tris-HCl buffer pH and DNA taken in DMSO-buffer mixture at 7.1 pH.

\*  $E_{1/2}$  is the equivalent of the average of  $E_{pc}$  and  $E_{pa}$  in CV experiments and  $\Delta E$  is the pulse amplitude (50 mV)  $R = [DNA/[compound]]$ .

Measured  $V_s$  Ag/AgCl electrolyte: Scan rate=50 mVs<sup>-1</sup>; supporting electrolyte 5 mM Tris-HCl / 50 mM NaCl; [compound] = 100  $\mu$ M.
